# Supplementary material for: The Adsorption of Dextranase onto Mg/Fe-Layered Double Hydroxide: Insight into the Immobilization
Source: PubMed Central journal article supplement (PMC5869664; doi:10.3390/nano8030173), 2018-03-19
Supplement: nanomaterials-08-00173-s001.pdf [file nanomaterials-08-00173-s001.pdf]

Supplementary materials:

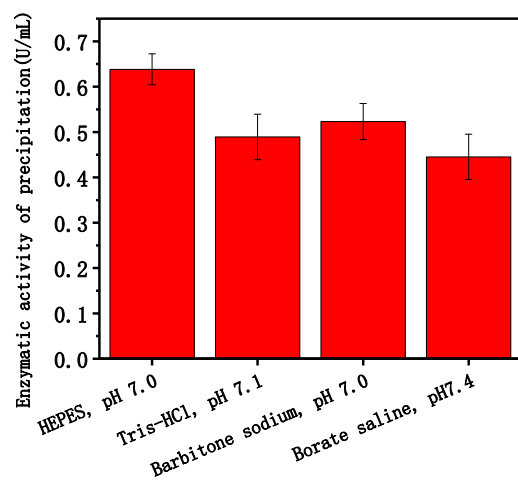

Fig. S1 Effect of different buffers on the adsorption of dextranase onto Mg/Fe-LDH

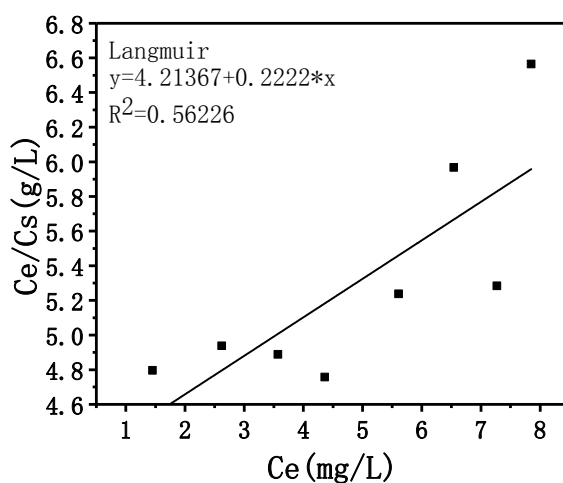

Fig. S2 Modeling according to Langmuir equation

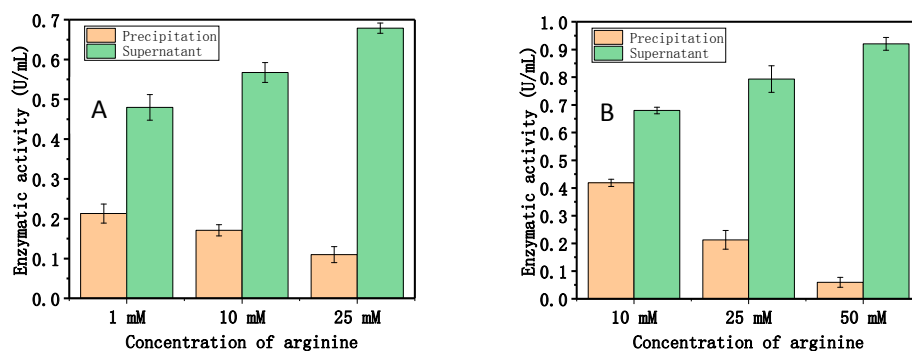

Fig. S3 Effects of arginine on the adsorption(A) and elution of dextranase(B)

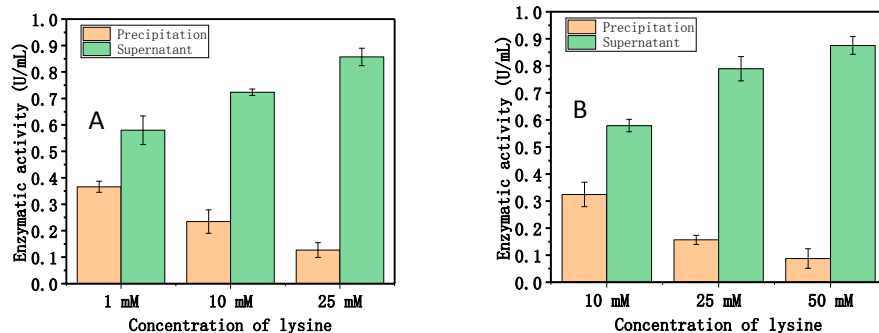

**Fig. S4** Effects of lysine on the adsorption(A) and elution of dextranase(B)

The sequence of amino acids of dextranase from *A. Oxydans* KQ11:

MPGTGLRGLAKRMTAAAAVFLISSGAVLPAQAATTAGHTPSTAPAAPTDKHAITADNGNLH  
 TWWHDNAVFNNTTGPTGNDEVRRSSFYDLQVAQENQPKAYDAFTYMSIPRSGDKKIGYTKED  
 GAEFSSQAGLTMSWSSFYAKDVWVDVSLRTGQTITSADQVQIRPSSYNFEKQLVDADTVKIKVP  
 YSDAGYRFSVEFEPQLYTAYNDSGDSGKLTTEAEGNRAIHTEPRNSMMIFAEPKLRGEQKERL  
 VPTEESGSIHYPAEGEVTNLNAVTEIIYFKPGTYSMGSDYHAVLPPNVKWVYLAPGAYVKGAF  
 RFLHDNQSQYKVTGYGVLSGEQYVYEADTNNNNYHLSGASNCHSSCVKMLQFASADAEQKLD  
 LQGVTVAEPPYHSFVVYGNEQTFHNMVENYKQVGSWYWQTDGIELYKGSTMKNTFFNANDD  
 VLKMYHSDVTIDNTVIWKNENGPVIQWGWTPRNIDNVNVTNTTVIHNRMYWKDVKYNTCIL  
 NSSSHWEDMGSTTKADPNTTVKNMRFENITVEGMTNCAIRVYALSDTENIHVKNLNIDAWNG  
 LDWTSQVSHLKRYTNPAGEKVTIGNEIPDGNGLALENYSVGGEVIEKTADNWADHQLGRIGFD  
 GENWNSWNAWRTPQ

**Table S1** The classification of amino acids in the protein sequence of dextranase

| Name         | Number     | Classification  |
|--------------|------------|-----------------|
| Histidine    | 16         | Cationic AAs    |
| Arginine     | 17         | Cationic AAs    |
| Lysine       | 30         | Cationic AAs    |
| Alanine      | 51         | Hydrophobic AAs |
| Methionine   | 16         | Hydrophobic AAs |
| Leucine      | 32         | Hydrophobic AAs |
| Proline      | 27         | Hydrophobic AAs |
| Valine       | 45         | Hydrophobic AAs |
| Tyrosine     | 32         | Hydrophobic AAs |
| Phenylalaine | 30         | Hydrophobic AAs |
| Isoleucine   | 27         | Hydrophobic AAs |
| Asparagine   | 51         | Hydrophobic AAs |
| Tryptophane  | 18         | Hydrophobic AAs |
| Other AAs    | 259        |                 |
| <b>Total</b> | <b>641</b> |                 |
